# Supplementary material
Source: PubMed Central journal article supplement (PMC5959763)
Supplement: NIHMS947568-supplement.pdf [file NIHMS947568-supplement.pdf]

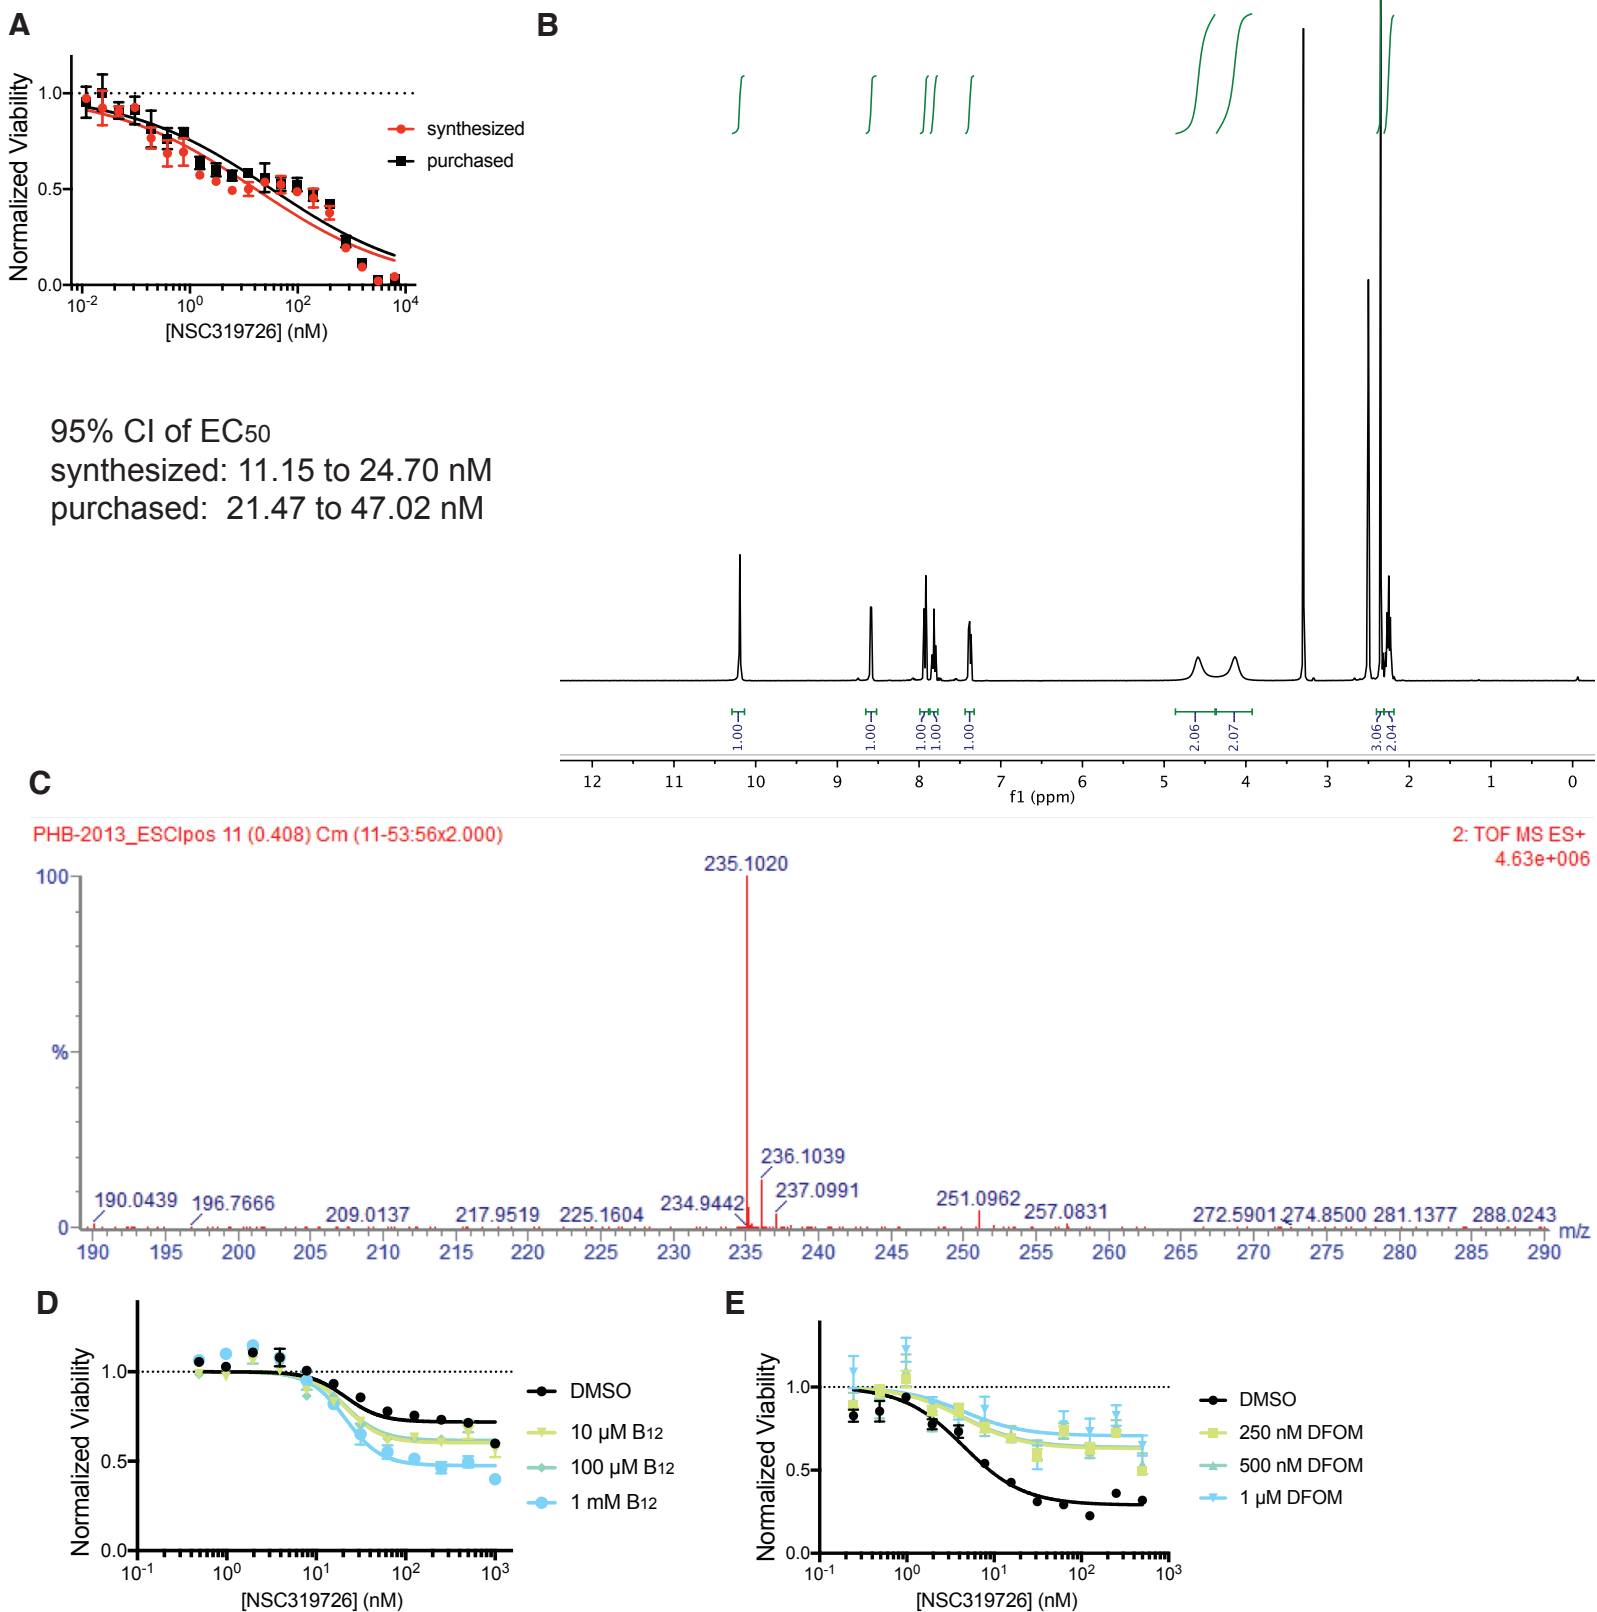

**Figure S1. Quality of synthesized NSC319726 and effects of metals on its lethality confirmed, related to Figure 1.**

**A.** Comparison of potencies between synthesized and purchased NSC319726 in HF2941 GBM cells. **B.** <sup>1</sup>H NMR spectrum of synthesized NSC319726 (in-house ID: PHB2013) in DMSO-*d*<sub>6</sub>. **C.** High-res mass spec of synthesized NSC319726. **D.** Effect of various concentrations of holo Vitamin B<sub>12</sub> supplementation on sensitivity to NSC319726 in HT-1080 cells. **E.** Effect of various concentrations of an iron-chelator deferoxamine (DFOM) cotreatment on sensitivity to NSC319726 in HT-1080 cells. Dose curves in **A**, **D**, and **E** show mean ± SEM of technical triplicates.

**A**

| Criteria                                        | Pro-death pathways<br>(agonizing NSC319726) | Pro-survival pathways<br>(antagonizing NSC319726) |
|-------------------------------------------------|---------------------------------------------|---------------------------------------------------|
| i) Correlation across the NCI-60 panel          | More expressed in sensitive cells           | More expressed in resistant cells                 |
| ii) Cellular response of GBM upon NSC treatment | Down-regulated upon NSC treatment           | Up-regulated upon NSC treatment                   |

**B**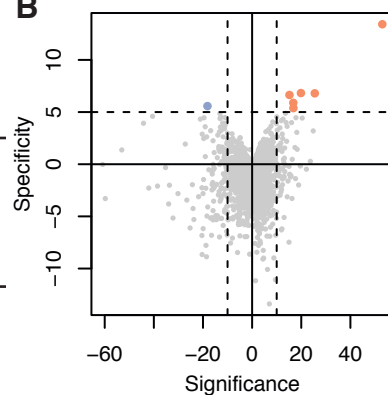**C**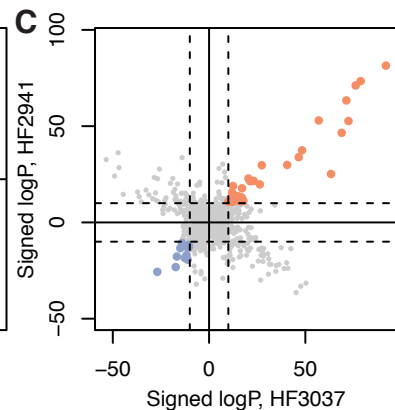**D**

| Pathway Name                                                   | NCI60 pharmacogenomics |             |                   | GBM transcriptome upon ZMC1 treatment |                    |                    |                   |
|----------------------------------------------------------------|------------------------|-------------|-------------------|---------------------------------------|--------------------|--------------------|-------------------|
|                                                                | Significance           | Specificity | is.selected (NCI) | Basal                                 | diff.exp. (hf3037) | diff.exp. (hf2941) | is.selected (GBM) |
| HALLMARK_TNFA_SIGNALING_VIA_NFKB                               | 25.51                  | 6.80        | TRUE              | 12.08                                 | 63.33              | 25.18              | TRUE              |
| HALLMARK_HYPOXIA                                               | 16.76                  | 5.89        | TRUE              | 7.08                                  | 48.30              | 37.49              | TRUE              |
| KEGG_OLFACTORY_TRANSDUCTION                                    | -2.61                  | -1.88       | FALSE             | -61.28                                | 71.30              | 63.38              | TRUE              |
| PID_P53_DOWNSTREAM_PATHWAY                                     | 3.84                   | -1.31       | FALSE             | 2.01                                  | 12.44              | 18.95              | TRUE              |
| PID_HIF1_TFPATHWAY                                             | 3.53                   | -0.79       | FALSE             | 3.45                                  | 14.62              | 13.57              | TRUE              |
| REACTOME_DEFENSINS                                             | 1.26                   | -0.86       | FALSE             | -9.58                                 | 11.40              | 10.88              | TRUE              |
| REACTOME_SIGNALING_BY_GPCR                                     | 7.61                   | -3.24       | FALSE             | 34.27                                 | 40.56              | 29.86              | TRUE              |
| REACTOME_OLFACTORY_SIGNALING_PATHWAY                           | -1.84                  | -2.75       | FALSE             | -71.16                                | 76.13              | 71.16              | TRUE              |
| REACTOME_GPCR_DOWNSTREAM_SIGNALING                             | 7.09                   | -3.57       | FALSE             | 37.93                                 | 46.56              | 33.91              | TRUE              |
| GO_NEGATIVE_REGULATION_OF_GENE_EXPRESSION                      | -3.11                  | -1.50       | FALSE             | 8.00                                  | 10.03              | 10.78              | TRUE              |
| GO_CELL_DEATH                                                  | 4.68                   | 0.98        | FALSE             | 8.09                                  | 16.21              | 11.00              | TRUE              |
| GO_SINGLE_ORGANISM_BIOSYNTHETIC_PROCESS                        | -5.56                  | -5.78       | FALSE             | -3.25                                 | -11.69             | -16.94             | TRUE              |
| GO_SENSORY_PERCEPTION_OF_CHEMICAL_STIMULUS                     | 3.73                   | -1.90       | FALSE             | -65.46                                | 78.76              | 73.43              | TRUE              |
| GO_ORGANOPHOSPHATE_METABOLIC_PROCESS                           | -2.15                  | -6.93       | FALSE             | 2.18                                  | -10.70             | -11.62             | TRUE              |
| GO_POSITIVE_REGULATION_OF_GENE_EXPRESSION                      | -1.92                  | -4.60       | FALSE             | 14.64                                 | 12.10              | 10.70              | TRUE              |
| GO_CARBOHYDRATE_DERIVATIVE_METABOLIC_PROCESS                   | 2.63                   | -7.79       | FALSE             | 2.29                                  | -11.11             | -19.30             | TRUE              |
| GO_NUCLEOBASE_CONTAINING_SMALL_MOLECULE_METABOLIC_PROCESS      | -5.75                  | -1.14       | FALSE             | 2.41                                  | -14.13             | -10.78             | TRUE              |
| GO_RESPONSE_TO_OXYGEN_LEVELS                                   | 6.07                   | -1.57       | FALSE             | 5.46                                  | 14.40              | 13.78              | TRUE              |
| GO_G_PROTEIN_COUPLED_RECEPTOR_SIGNALING_PATHWAY                | 7.97                   | -3.49       | FALSE             | 44.05                                 | 68.88              | 46.57              | TRUE              |
| GO_RESPONSE_TO_ABIOTIC_STIMULUS                                | 3.24                   | -2.50       | FALSE             | 5.89                                  | 14.10              | 13.30              | TRUE              |
| GO_RIBONUCLEOPROTEIN_COMPLEX_BIOGENESIS                        | -44.22                 | 3.93        | FALSE             | 6.02                                  | 15.43              | 13.35              | TRUE              |
| GO_DETECTION_OF_STIMULUS                                       | 2.66                   | -2.28       | FALSE             | -48.27                                | 56.97              | 52.98              | TRUE              |
| GO_GLYCOSYL_COMPOUND_METABOLIC_PROCESS                         | -6.77                  | -0.82       | FALSE             | 2.36                                  | -10.86             | -13.03             | TRUE              |
| GO_MRNA_METABOLIC_PROCESS                                      | -35.24                 | -0.32       | FALSE             | 7.70                                  | 11.16              | 12.39              | TRUE              |
| GO_PROTEIN_COMPLEX_SUBUNIT_ORGANIZATION                        | -8.22                  | 2.30        | FALSE             | -6.26                                 | -12.10             | -12.41             | TRUE              |
| GO_CELLULAR_RESPONSE_TO_STRESS                                 | -4.75                  | -0.88       | FALSE             | -7.85                                 | 27.40              | 29.73              | TRUE              |
| GO_REGULATION_OF_TRANSCRIPTION_FROM_RNA_POLYMERASE_II_PROMOTER | 1.70                   | -3.46       | FALSE             | 13.08                                 | 13.31              | 12.99              | TRUE              |
| GO_INTERMEDIATE_FILAMENT                                       | 1.30                   | -3.18       | FALSE             | -14.21                                | 17.11              | 17.77              | TRUE              |
| GO_ORGANELLE_INNER_MEMBRANE                                    | -21.08                 | 4.33        | FALSE             | -9.23                                 | -16.70             | -17.68             | TRUE              |
| GO_MITOCHONDRIAL_MATRIX                                        | -15.99                 | -0.58       | FALSE             | -8.28                                 | -10.42             | -12.52             | TRUE              |
| GO_MITOCHONDRIAL_PART                                          | -24.04                 | -4.24       | FALSE             | -15.60                                | -17.32             | -23.16             | TRUE              |
| GO_MITOCHONDRION                                               | -19.94                 | -6.17       | FALSE             | -18.89                                | -26.88             | -25.63             | TRUE              |
| GO_INTERMEDIATE_FILAMENT_CYTOSKELETON                          | 1.43                   | -1.60       | FALSE             | -11.54                                | 11.93              | 15.65              | TRUE              |
| GO_KERATIN_FILAMENT                                            | 2.11                   | -2.61       | FALSE             | 10.37                                 | 16.99              | 13.02              | TRUE              |
| GO_ENVELOPE                                                    | -19.10                 | 3.60        | FALSE             | -14.69                                | -14.94             | -13.35             | TRUE              |
| GO_MITOCHONDRIAL_ENVELOPE                                      | -17.62                 | -0.53       | FALSE             | -10.90                                | -12.64             | -18.45             | TRUE              |
| GO_OLFACTORY_RECEPTOR_ACTIVITY                                 | -2.05                  | -3.09       | FALSE             | -79.97                                | 91.83              | 81.46              | TRUE              |
| GO_G_PROTEIN_COUPLED_RECEPTOR_ACTIVITY                         | 7.68                   | 0.40        | FALSE             | 53.35                                 | 72.41              | 52.71              | TRUE              |
| GO_ENZYME_BINDING                                              | 4.78                   | -2.26       | FALSE             | 7.16                                  | 17.86              | 11.22              | TRUE              |
| GO_POLY_A_RNA_BINDING                                          | -60.85                 | -0.02       | FALSE             | -11.50                                | 20.46              | 22.83              | TRUE              |
| GO_RNA_BINDING                                                 | -59.76                 | -3.29       | FALSE             | -12.20                                | 21.36              | 21.41              | TRUE              |
| GO_ODORANT_BINDING                                             | NA                     | NA          | FALSE             | -19.78                                | 23.15              | 21.62              | TRUE              |
| HALLMARK_GLYCOLYSIS                                            | 5.43                   | -1.10       | FALSE             | 5.61                                  | 14.31              | 11.54              | TRUE              |
| HALLMARK_P53_PATHWAY                                           | 3.75                   | -0.95       | FALSE             | 3.22                                  | 26.37              | 19.78              | TRUE              |
| GO_REGULATION_OF_ANATOMICAL_STRUCTURE_MORPHOGENESIS            | 19.87                  | 6.83        | TRUE              | 11.63                                 | -6.30              | -9.64              | FALSE             |
| GO_NEGATIVE_REGULATION_OF_RESPONSE_TO_STIMULUS                 | 15.20                  | 6.64        | TRUE              | 9.86                                  | 10.32              | -4.79              | FALSE             |
| GO_NUCLEAR_CHROMOSOME_TELOMERIC_REGION                         | -18.17                 | 5.58        | TRUE              | -2.25                                 | -4.20              | 3.86               | FALSE             |
| GO_GOLGI_APPARATUS                                             | 16.81                  | 5.38        | TRUE              | -10.33                                | 10.73              | -14.50             | FALSE             |
| HALLMARK_EPITHELIAL_MESENCHYMAL_TRANSITION                     | 52.99                  | 13.42       | TRUE              | 32.47                                 | 7.37               | -18.27             | FALSE             |

**Figure S2. Pharmacogenomic analysis of NSC319726's mechanism of action, related to Figure 4.**

**A.** Criteria for choosing pathways involved in NSC319726-induced cell death. **B.** Pathways (gene sets) predicted to be involved in NSC319726's mechanism of action (MoA) through NCI-60 pharmacogenomics. Each point corresponds to one pathway (gene set), whose x- and y-coordinates correspond to significance and specificity. Orange points are expected to be pro-survival pathways while blue points are expected to be pro-death pathways. **C.** Pathways predicted to be involved in NSC319726's MoA through RNA-seq of GBM cells treated with NSC319726. x- and y- coordinates correspond to signed logP values in HF3037 (most sensitive) and HF2941 (most resistant) GBM cells. Color codes are the same as in **B.** **D.** Pathways that were significantly associated with NSC319726's mechanism of action either in **B** or **C** are shown on this list.

**A**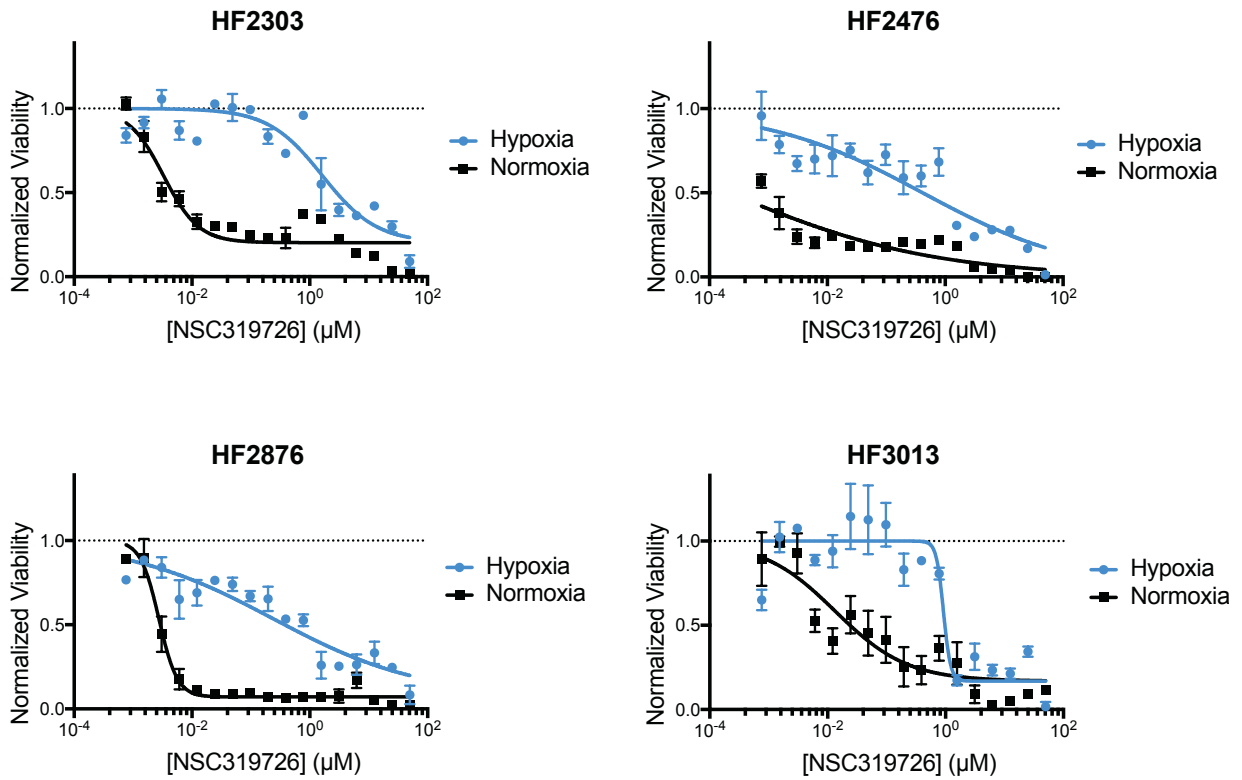**B**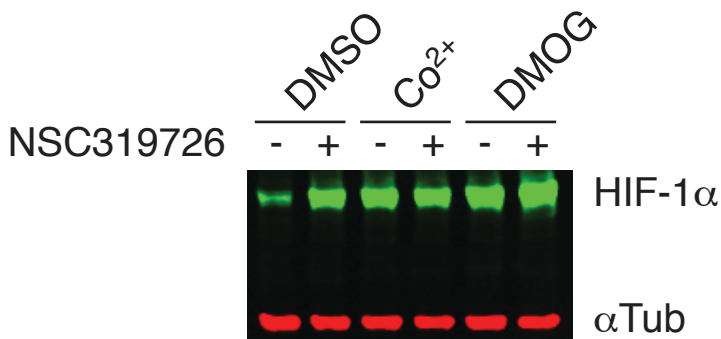**Figure S3. NSC319726's mechanism of action and hypoxia, related to Figure 4.**

**A.** Sensitivity to NSC319726 in four GBM cells under normoxia and hypoxia. **B.** Pharmacological stabilization of HIF-1 $\alpha$ . Dose curves in **A** show mean  $\pm$  SEM of technical triplicates.

**A HF3037**

|    |            | DOWN       |     |
|----|------------|------------|-----|
|    |            | consistent | not |
| UP | consistent | 27         | 64  |
|    | not        | 40         | 799 |

**B HF2941**

|    |            | DOWN       |     |
|----|------------|------------|-----|
|    |            | consistent | not |
| UP | consistent | 14         | 45  |
|    | not        | 30         | 841 |

**C Consistent experiments with two cell lines**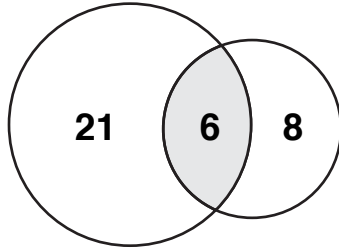

|                                         | HF3037 |        | HF2941 |        |
|-----------------------------------------|--------|--------|--------|--------|
|                                         | UP     | DOWN   | UP     | DOWN   |
| BUYTAERT_PHOTODYNAMIC_THERAPY_STRESS    | 163.39 | -86.37 | 62.49  | -24.30 |
| BLALOCK_ALZHEIMERS_DISEASE              | 30.71  | -25.51 | 12.55  | -25.79 |
| GRAESSMANN_APOPTOSIS_BY_DOXORUBICIN     | 29.90  | -52.85 | 16.02  | -19.87 |
| CONCANNON_APOPTOSIS_BY_EPOXOMICIN       | 28.07  | -22.03 | 12.25  | -12.56 |
| SENESE_HDAC1_TARGETS                    | 20.10  | -16.39 | 20.10  | -21.67 |
| RODRIGUES_THYROID_CARCCINOMA_ANAPLASTIC | 18.82  | -14.19 | 26.89  | -19.14 |

**D Up/down-regulated genes in Buytaert *et al.***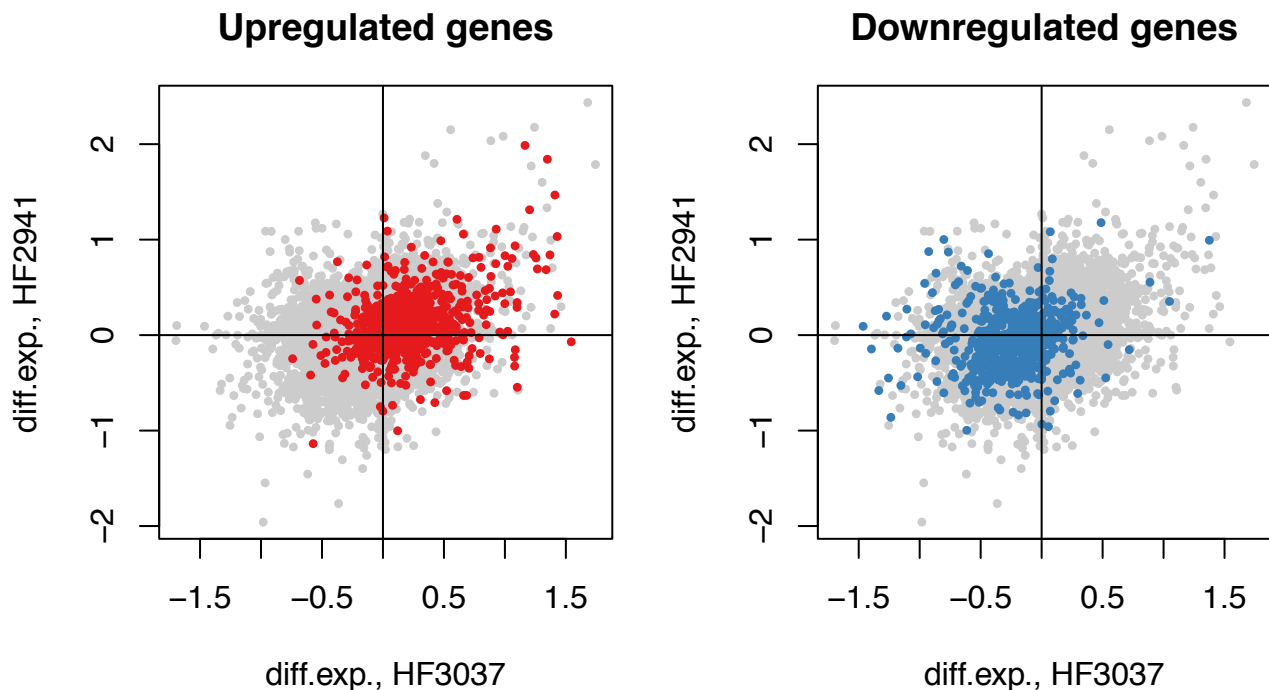**Figure S4. Experiments inducing similar gene expression changes to NSC treatment, related to Figure 5.**

**A.** Contingency table showing the number of experimental conditions from MSigDB whose gene expression changes are consistent in HF3037 cells. Both up- and down-regulated gene sets of each experiment were compiled in MSigDB. An experiment was considered consistent when genes up- or down-regulated in the experiment were also significantly changed in the same way upon NSC319726 treatment in the cells. **B.** Contingency table in HF2941 cells. **C.** 6 experiments were consistent regarding both up- and down-regulated genes in both HF3037 and HF2941 cells. **D.** Scatter plots showing log<sub>10</sub>-fold changes of gene expression upon NSC319726 over DMSO treatments in the two GBM cells. Up- and down-regulated genes in Buytaert *et al.* were colored in red and blue in the plots, respectively.



### A H<sub>2</sub>DCFDA cell free assay

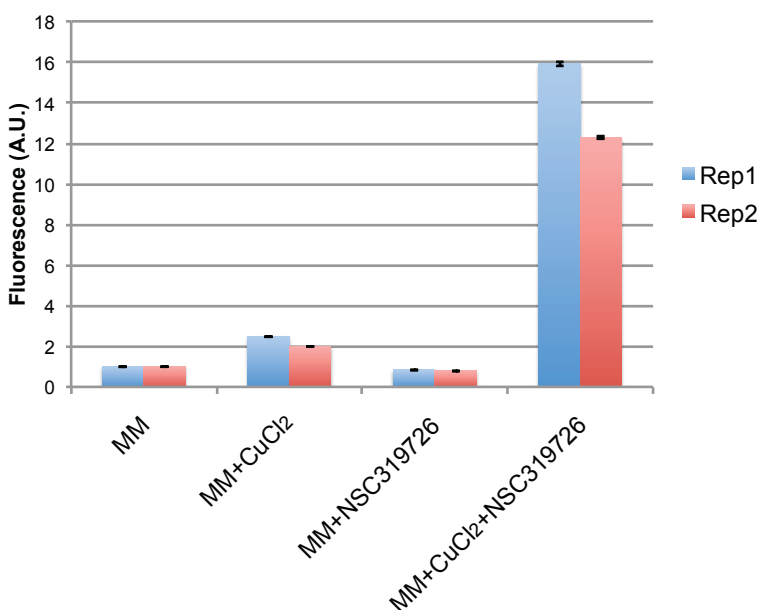

### D Cell death inhibitor co-treatments with NSC319726

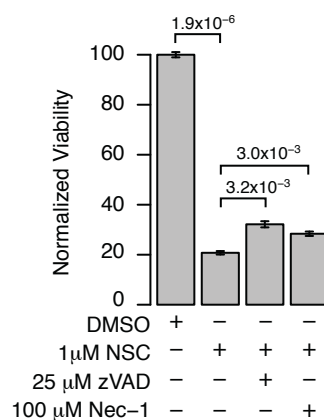

### B NAC supplementation

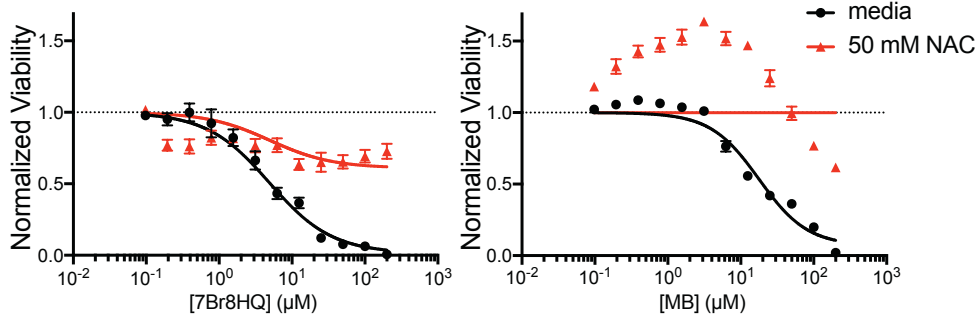

### C antioxidant co-treatments with NSC/8HQ/MB

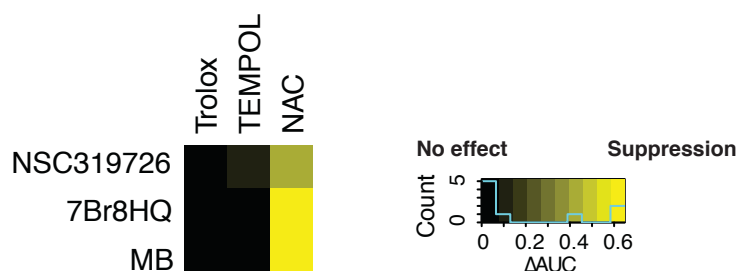

### E H<sub>2</sub>DCFDA staining

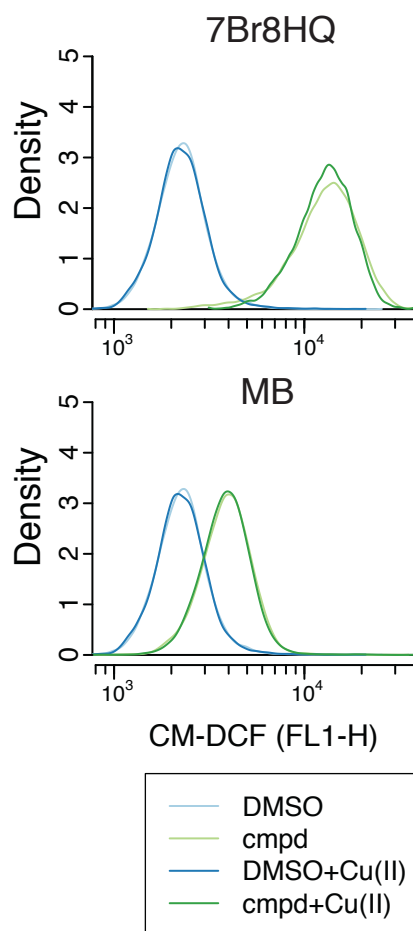

### Figure S5. Three compounds, NSC319726/7Br8HQ/MB, and ROS generation, related to Figure 5.

**A.** Production of DCF-detected ROS in cell free system. MM indicates master mixtute containing H<sub>2</sub>DCFDA + L-Cysteine + H<sub>2</sub>O<sub>2</sub>. **B-C.** 7Br8HQ and MB induced ROS generation. **B.** Effect of *N*-acetylcysteine on 7Br8HQ and MB lethality in HT-1080 cells. **C.** Effects of small panel of antioxidant (100 μM Trolox, 100μM TEMPOL (4-hydroxy TEMPO), 100mM NAC) on NSC319726/7Br8HQ/MB treatments tested in dilution series. Color code corresponds to the degree an antioxidant suppresses a lethal compound, which was assessed by  $\Delta AUC = AUC_{M,L} - AUC_L$ , where AUC indicates area-under dose-response curve of a lethal compound in HT-1080 cells, M and L indicate corresponding antioxidant and lethal compound, respectively. **D.** Effects of apoptosis (zVAD) and necroptosis (Nec-1) inhibitors on 1μM NSC319726 cytotoxicity. P-values from two-sided t-test are shown. **E.** CM-H<sub>2</sub>DCFDA staining of cells treated with DMSO/7Br8HQ/MB and media/Cu(II). **A, B,** and **D** indicate mean  $\pm$  SEM of technical triplicates.

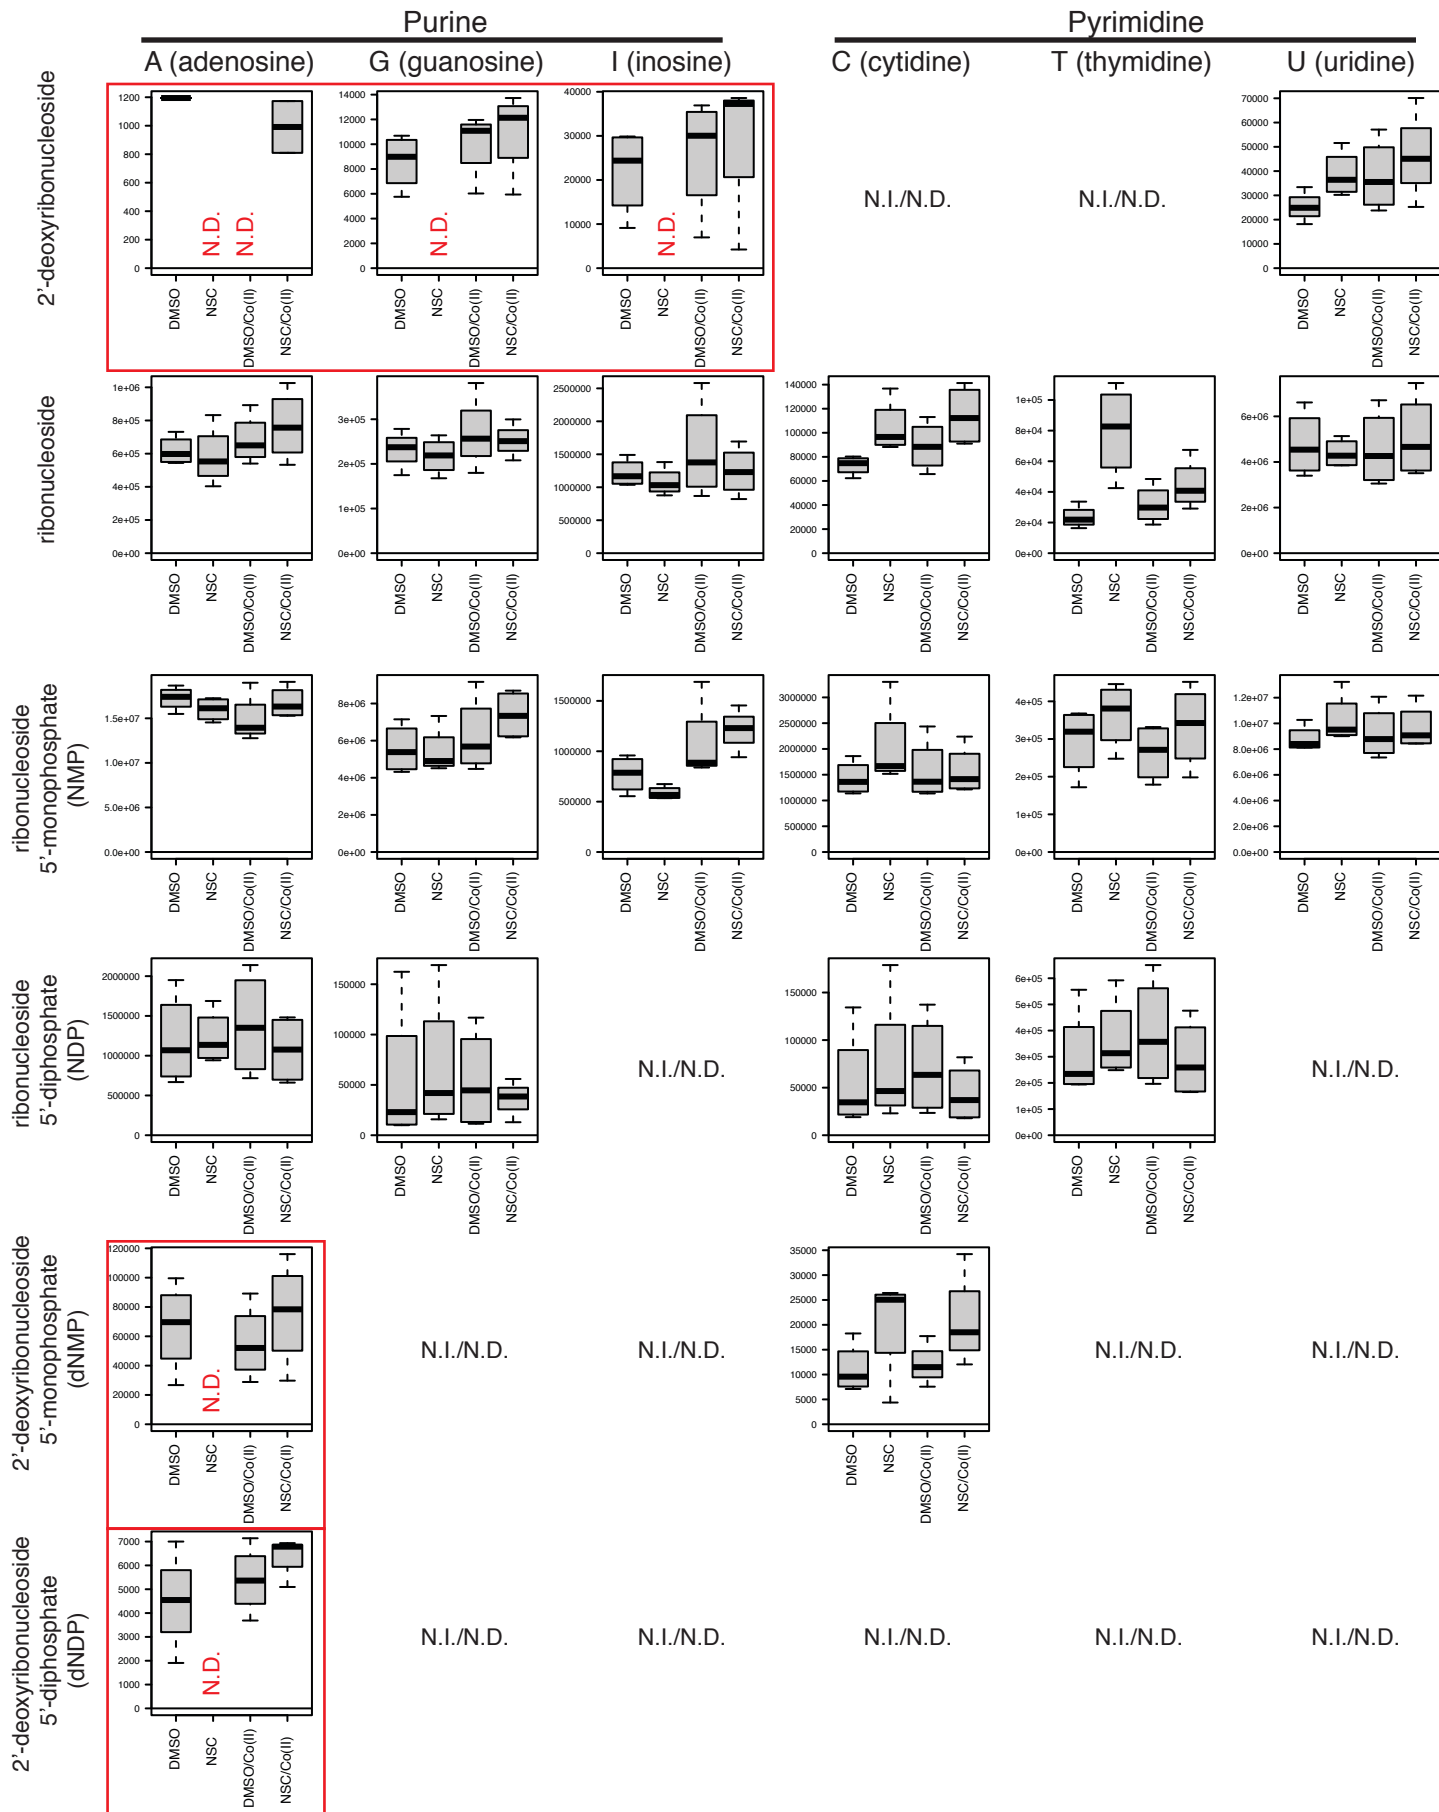

**Figure S6. Quantification of purine/pyrimidine metabolites upon NSC treatment, related to Figure 5.** A subset of untargeted metabolomic profiling showing purine and pyrimidine metabolites in HT-1080 cells. Each barplot summarizes biological quadruplicates of four conditions (0.1% DMSO, 5 μM NSC319726, DMSO/100 μM CoCl<sub>2</sub>, 5 μM NSC319726/100 μM CoCl<sub>2</sub>). Growth of HT-1080 cells was arrested when only NSC319726 was added and not on the other conditions. N.D.: not detected. N.I./N.D.: either not included in the metabolomic profiling from the beginning, or included but not detected because the quantity was too low in all four conditions.

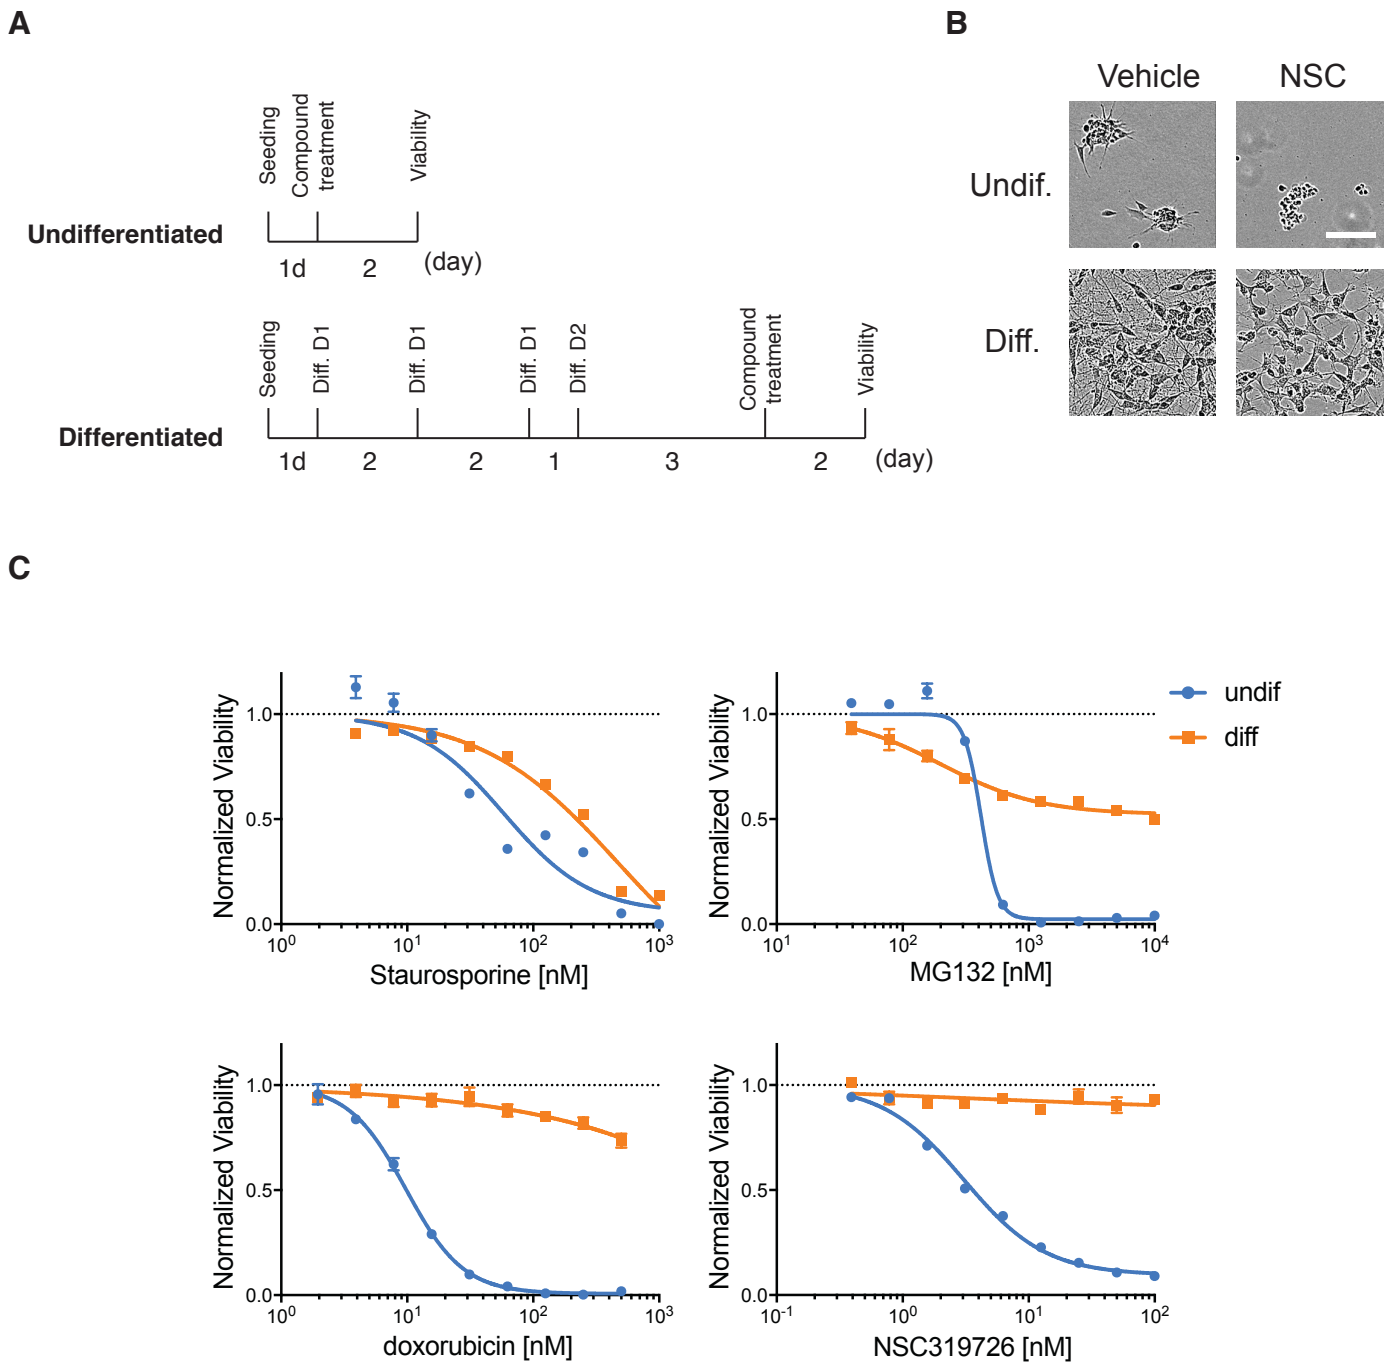

**Figure S7. Neurotoxicity of four lethal compounds including NSC391726, related to Figure 5.**  
**A.** Scheme of neurotoxicity testing in undifferentiated and differentiated SH-SY5Y cells. **B.** Micrographs of SH-SY5Y cells treated with 1  $\mu$ M NSC391726 or vehicle (0.1% DMSO) treatment. Scale bar is 100  $\mu$ m.  
**C.** Dose-response curves of 9-points 2-fold dilution series of four lethal compounds in SH-SY5Y cells were shown. Experiments were performed in biological triplicates, and mean and SEM of the representative replicate were shown.
